# Supplementary material for: β-Cyclodextrin-based hollow nanoparticles with excellent adsorption performance towards organic and inorganic pollutants
Source: Royal Society of Chemistry journal article supplement (doi:10.1039/c9nr07342f), 2019-01-01
Supplement: c9nr07342f3.pdf [file c9nr07342f3.pdf]

## Supporting Information

### **$\beta$ -Cyclodextrin-based Hollow Nanoparticles with Excellent Adsorption**

#### **Performance towards Organic and Inorganic Pollutants**

Yinli Liu,<sup>a</sup> Miao Liu,<sup>a</sup> Jie Jia,<sup>a</sup> Dequn Wu,<sup>\*a</sup> Tingting Gao,<sup>a</sup> Xueli Wang,<sup>b</sup> Jianyong Yu<sup>b</sup> and Faxue Li<sup>\*a</sup>

<sup>a</sup> *Key Laboratory of Textile Science & Technology, Ministry of Education, College of Textiles, Donghua University, Shanghai 201620, China.*

<sup>b</sup> *Innovation Center for Textile Science & Technology, Donghua University, Shanghai 201620, China.*

Email: FX Li (fxlee@dhu.edu.cn) or DQ Wu (dqwu@dhu.edu.cn)

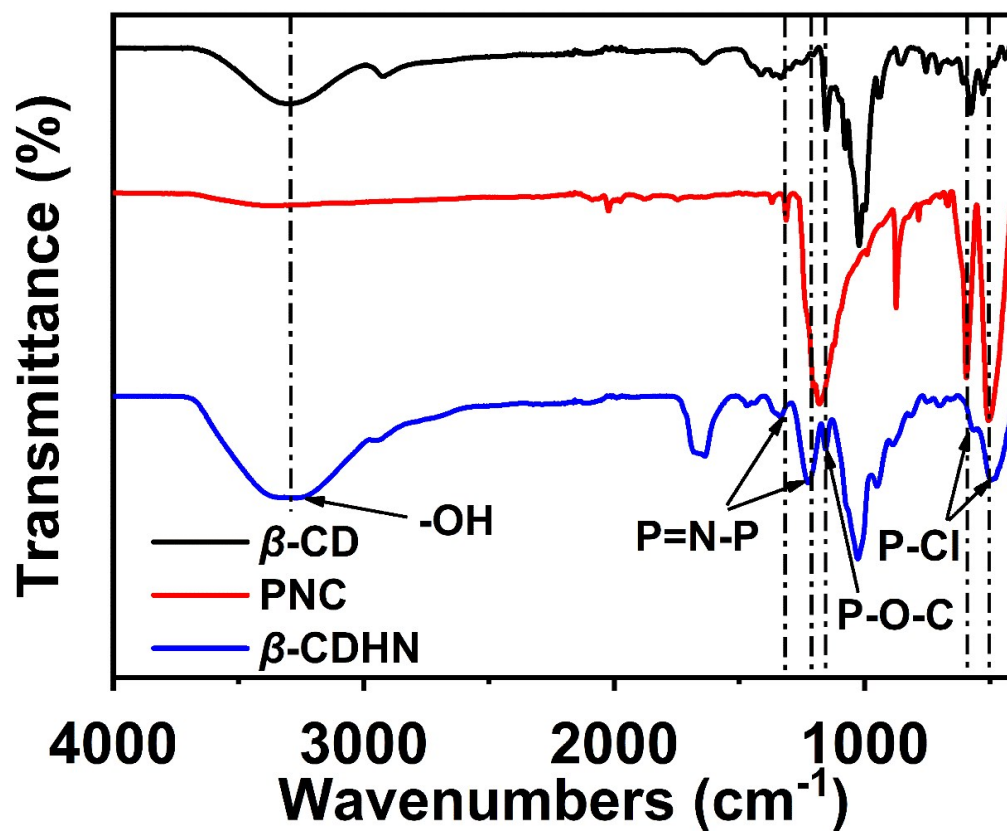

Figure S1. FTIR spectra of  $\beta$ -CD, PNC and  $\beta$ -CDHN.

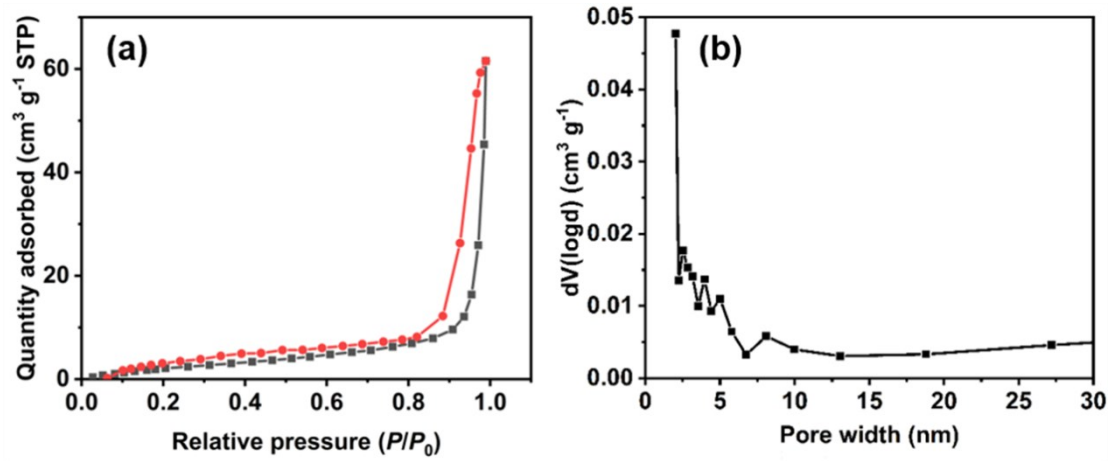

Figure S2. (a) N<sub>2</sub> sorption isotherms of β-CDP. Pore size distribution of (b) β-CDP determined by using density functional theory (DFT) model.

Table S1 Preparation and pore parameters of  $\beta$ -CDHN and  $\beta$ -CDP.

| Samples       | rotational speed (rpm) | yield (%) | pore width (nm) | BET (m <sup>2</sup> /g) | pore volume (cm <sup>3</sup> /g) |
|---------------|------------------------|-----------|-----------------|-------------------------|----------------------------------|
| $\beta$ -CDHN | 1500                   | 57.45     | 2.0             | 456.57                  | 0.581                            |
| $\beta$ -CDP  | 0                      | 59.16     | 2.1             | 76.39                   | 0.216                            |

Table S2. Summary of adsorption kinetics model fitting parameters of MB, Pb<sup>2+</sup> and BPA on  $\beta$ -CDHN at 25 °C.

| Adsorbent     | pollutants       | Pseudo-first-order                |                               |       | Pseudo-second-order               |                                                  |       |
|---------------|------------------|-----------------------------------|-------------------------------|-------|-----------------------------------|--------------------------------------------------|-------|
|               |                  | $q_{1e}$<br>(mg g <sup>-1</sup> ) | $K_1$<br>(min <sup>-1</sup> ) | $R^2$ | $q_{2e}$<br>(mg g <sup>-1</sup> ) | $K_2$<br>(g mg <sup>-1</sup> min <sup>-1</sup> ) | $R^2$ |
| $\beta$ -CDHN | MB               | 99.29                             | 2.64                          | 0.921 | 100                               | 0.19                                             | 0.999 |
|               | Pb <sup>2+</sup> | 9.91                              | 1.79                          | 0.991 | 9.97                              | 1.5                                              | 0.999 |
|               | BPA              | 21.90                             | 3.55                          | 0.996 | 21.99                             | 1.54                                             | 0.999 |

Table S3. Summary of adsorption isotherm fitting parameters of MB, Pb<sup>2+</sup> and BPA on  $\beta$ -CDHN and  $\beta$ -CDP at 25 °C.

| Adsorbents    | pollutants       | Experimental<br>$q_m$ (mg/g) | Langmuir isotherm |            |       | Freundlich isotherm |      |       |
|---------------|------------------|------------------------------|-------------------|------------|-------|---------------------|------|-------|
|               |                  |                              | $q_m$ (mg/g)      | $b$ (L/mg) | $R^2$ | $K_F$               | $n$  | $R^2$ |
| $\beta$ -CDHN | MB               | 1828.26                      | 2080.35           | 0.158      | 0.996 | 257.18              | 1.83 | 0.899 |
|               | Pb <sup>2+</sup> | 399.52                       | 427.35            | 0.014      | 0.992 | 31.15               | 1.82 | 0.981 |
|               | BPA              | 106.86                       | 120.48            | 0.048      | 0.995 | 16.74               | 2.85 | 0.904 |
| $\beta$ -CDP  | MB               | 1305.76                      | 1481.96           | 0.126      | 0.998 | 128.16              | 1.07 | 0.867 |
|               | Pb <sup>2+</sup> | 305.89                       | 374.86            | 0.005      | 0.992 | 25.74               | 1.53 | 0.937 |
|               | BPA              | 85.32                        | 94.82             | 0.038      | 0.993 | 14.31               | 2.48 | 0.952 |

Table S4. Adsorption capacity of pollutants on  $\beta$ -CDHN at different temperatures.

| Adsorbent     | pollutants       | Adsorption capacity (mg g <sup>-1</sup> ) |         |         |
|---------------|------------------|-------------------------------------------|---------|---------|
|               |                  | 298.15K                                   | 308.15K | 313.15K |
| $\beta$ -CDHN | MB               | 2080.35                                   | 2267.58 | 2392.41 |
|               | Pb <sup>2+</sup> | 427.35                                    | 461.54  | 504.27  |
|               | BPA              | 120.48                                    | 130.12  | 143.37  |
